# Supplementary material for: Biochemical Characterization and Elucidation of Action Pattern of a Novel Polysaccharide Lyase 6 Family Alginate Lyase from Marine Bacterium Flammeovirga sp. NJ-04
Source: PubMed Central journal article supplement (PMC6627919; doi:10.3390/md17060323), 2019-05-31
Supplement: marinedrugs-17-00323-s001.pdf [file marinedrugs-17-00323-s001.pdf]

Table S1 The primers for cloning the gene of FsAlyPL6.

|           |                                           |
|-----------|-------------------------------------------|
| FsAlyPL6F | 5'- <u>CATATG</u> CAAAAGCTTGTGAACGATGT-3' |
| FsAlyPL6R | 5'- <u>CTCGAG</u> CTTATTGATCATTTTCACGT-3' |
